# Supplementary material for: Crystal Structure of an Archaeal Tyrosyl-tRNA Synthetase Bound to Photocaged L-Tyrosine and Its Potential Application to Time-Resolved X-ray Crystallography
Source: MDPI journal article supplement (doi:10.3390/ijms231810399), 2022-09-08
Supplement: s1 [file s1]

## Supplementary Materials

### Figures S1-4

### Tables S1-S3

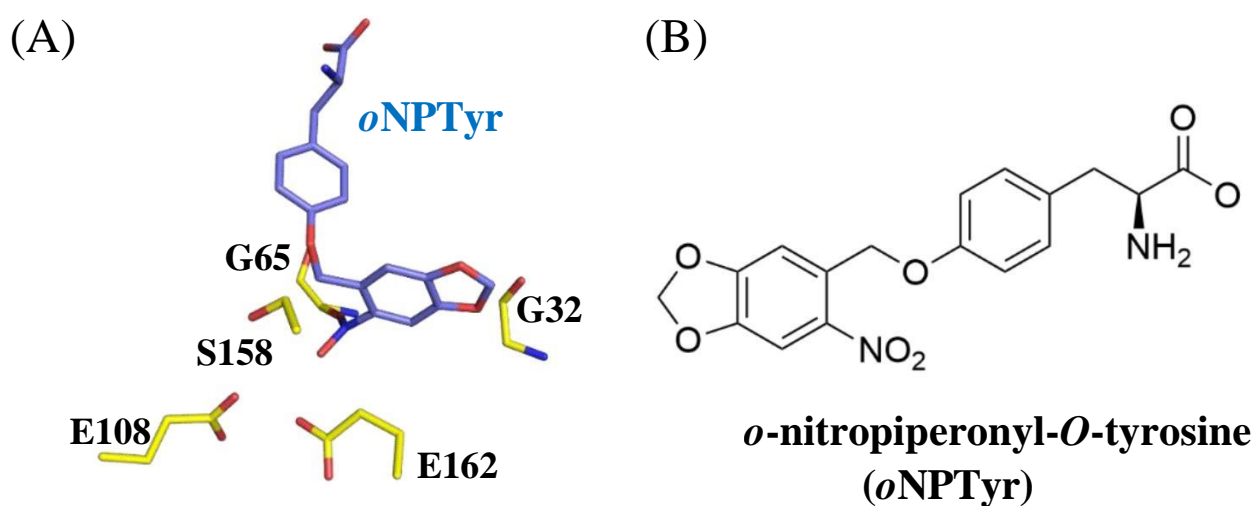

**Figure S1. *o*NPTyr (light blue) modeled in the amino acid binding site of *o*NBTyrRS.**

(A) The five mutated residues essential for recognizing *o*NBTyr are shown in yellow sticks. There is no structural clash with *o*NBTyrRS and the position of the *o*-nitrobenzyl group is the same as that of *o*NBTyr shown in Figure 1C.

(B) Chemical structure of *o*NPTyr.

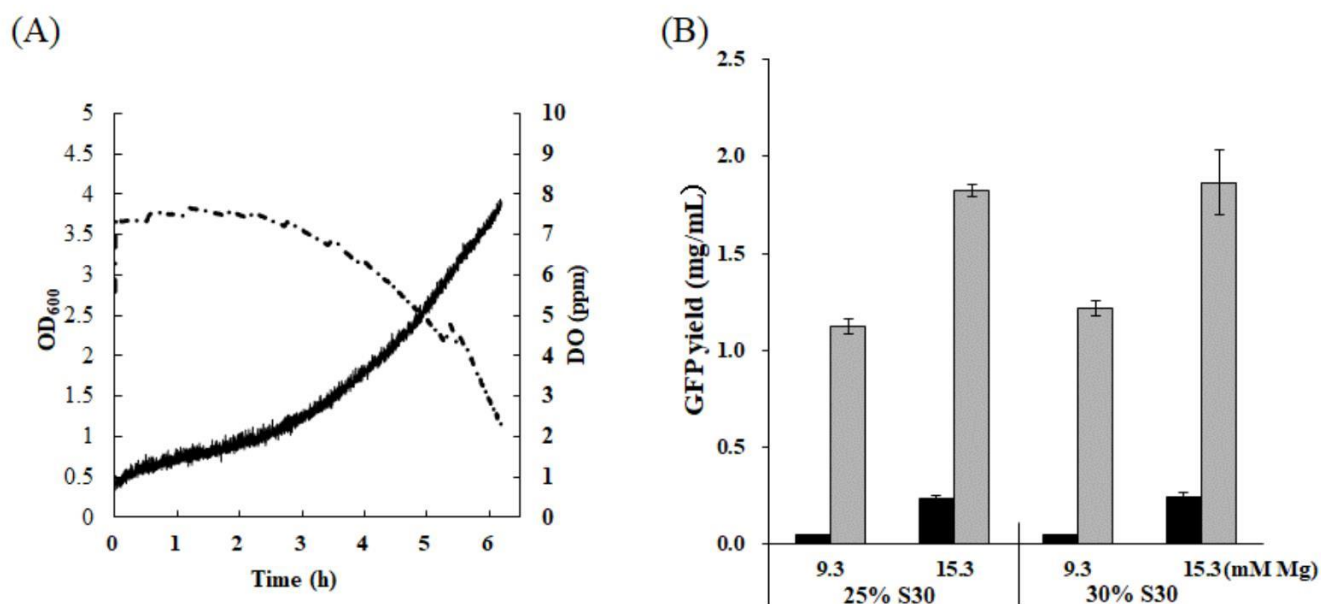

**Figure S2. Preparation of cell-free protein synthesis system for site-specific incorporation of nonnatural amino acids.**

(A) Continuous measurements of optical density at 600 nm (OD<sub>600</sub>) and dissolved oxygen concentration (DO, dashed line) during culture of the *E. coli* strain B95. delta A transformed with the plasmid harboring iodoTyrRS and the cognate tRNA [22]. (B) Examination of concentrations of S30 extract and Mg acetate for production of N11-GFPS2 with Y21amber mutation with (gray) or without (black) *p*-benzoyl-Phe (*p*Bpa). Data represent the mean  $\pm$  standard deviation (s.d.) of three independent experiments.

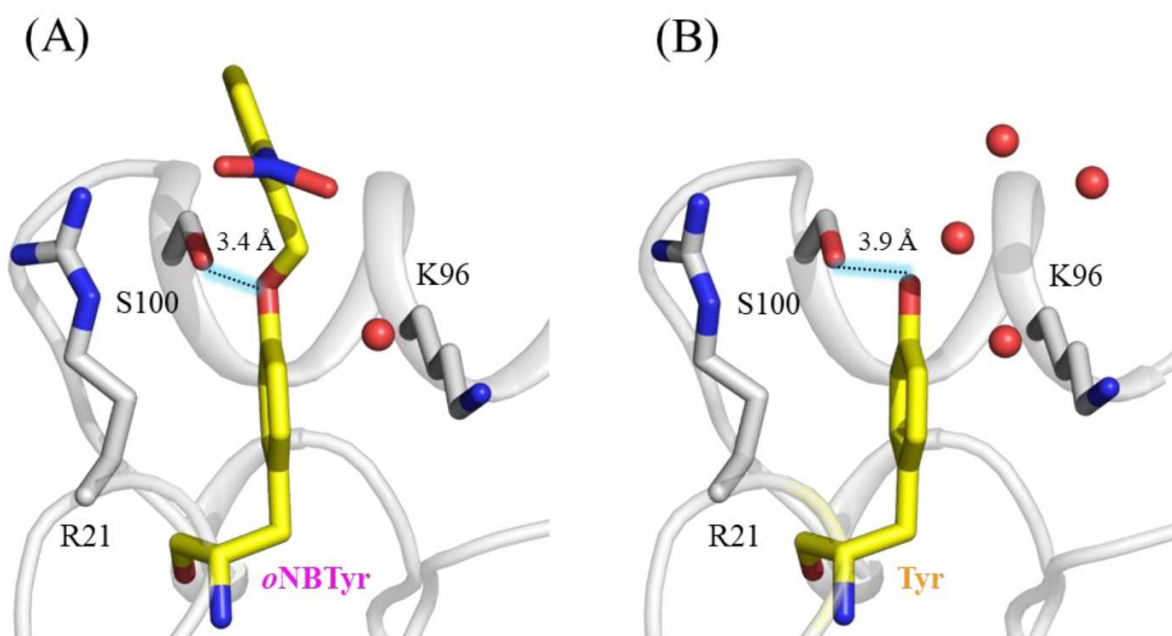

**Supplemental Figure S3. Close-up views around position 20 of *o*NBTyr-incorporated HEWL in the dark state (A) and the light state (B).**

(A) The structure of *o*NBTyr at position 20 and neighbor amino acids of the dark state lysozyme. The tyrosyl moiety of *o*NBTyr20 forms the stacking interaction between Arg21 and Lys96 and the hydrogen bond interaction between the oxygen atom and Ser100 at a distance of 3.4 Å. The nitrobenzyl group forms an electrostatic interaction with Arg21 at a distance of 4.3 Å. (B) The structure of Tyr at position 20 and neighbor amino acids of the photolyzed lysozyme. The distance between the oxygen atom and Ser100 is 3.9 Å. Water molecules are shown in red spheres.

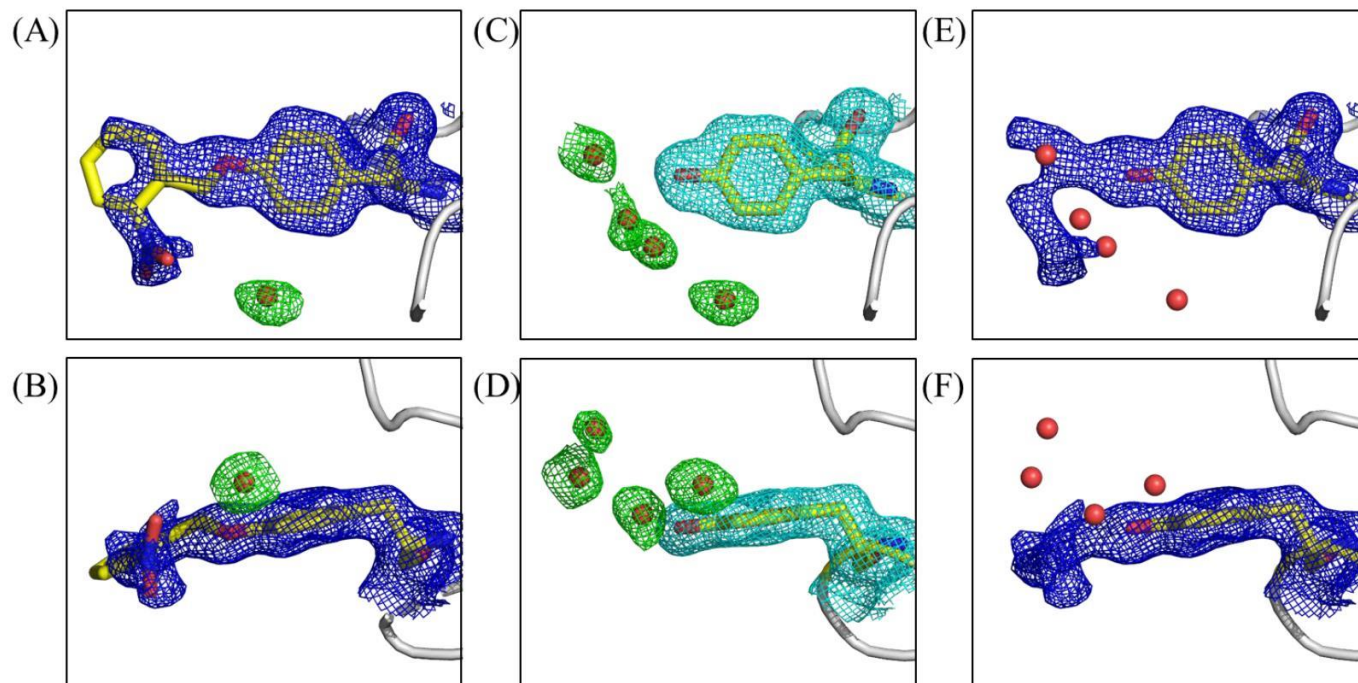

**Supplemental Figure S4. Close-up views of the Tyr at position 20 of HEWL.**

(A and B) The  $|2F_o - F_c|$  electron density map ( $0.6\sigma$ ) of the dark state lysozyme structure is represented by a blue mesh corresponding to ONBTyr at position 20 and a green mesh corresponding to water molecules within  $5.1 \text{ \AA}$  around *o*NBTyr20. (C and D) The  $|2F_o - F_c|$  electron density map ( $0.6\sigma$ ) of the photolyzed lysozyme structure is depicted by a cyan mesh corresponding to Tyr20 and a green mesh corresponding to water molecules within  $5.1 \text{ \AA}$  around Tyr20. (E and F) Superposition of the  $|2F_o - F_c|$  electron density map ( $0.6\sigma$ ) in the dark state (blue mesh) and the photolyzed lysozyme structure with Tyr20 (yellow sticks). Water molecules are shown in red. The upper panels were rotated  $90^\circ$  and shown in their respective lower panels.

**Table S1: Crystallographic data and refinement statistics.**

|                                           | Lysozyme                         |                                  | ONBTyrRS                          |
|-------------------------------------------|----------------------------------|----------------------------------|-----------------------------------|
|                                           | Dark                             | Light                            | Dark                              |
| PDB ID                                    | 7YNU                             | 7YNV                             | 7YNW                              |
| <b>Data collection</b>                    |                                  |                                  |                                   |
| Resolution range                          | 35.6-1.44 (1.49-1.44)            | 39.1-1.40 (1.44-1.39)            | 41.6-2.8 (2.89-2.79)              |
| Space group                               | $P4_32_12$                       | $P4_32_12$                       | $P6_522$                          |
| Unit cell (Å)                             | a=79.7, b=79.7, c=37.1           | a=78.3, b=78.3, c=37.4           | a=83.5, b=83.5, c=488.7           |
| Unit cell (°)                             | $\alpha=90, \beta=90, \gamma=90$ | $\alpha=90, \beta=90, \gamma=90$ | $\alpha=90, \beta=90, \gamma=120$ |
| Number of total reflections               | 350464                           | 526454                           | 968582                            |
| Number of unique reflections              | 22080                            | 23827                            | 26487                             |
| Multiplicity                              | 15.9 (15.0)                      | 22.1 (16.4)                      | 36.6 (37.2)                       |
| Completeness (%)                          | 99.6 (100)                       | 99.5 (95.1)                      | 98.6 (98.5)                       |
| I/ $\sigma$ (I)                           | 5.63 (0.91)                      | 23.1 (6.1)                       | 20.5 (0.7)                        |
| R <sub>merge</sub> (%)                    | 22.3 (96.2)                      | 12.1 (40.4)                      | 12.9 (506.8)                      |
| CC <sub>1/2</sub>                         | 1.0 (0.68)                       | 1.0 (0.95)                       | 1.0 (0.93)                        |
| <b>Refinement</b>                         |                                  |                                  |                                   |
| R <sub>work</sub> / R <sub>free</sub> (%) | 19.1/22.3                        | 17.4/19.2                        | 26.1/29.8                         |
| r.m.s.d. bond lengths (Å)                 | 0.007                            | 0.004                            | 0.003                             |
| r.m.s.d. bond angles (°)                  | 0.89                             | 0.64                             | 0.589                             |
| Ramachandran plot                         |                                  |                                  |                                   |
| Favored                                   | 98.4                             | 98.4                             | 97.7                              |
| Allowed                                   | 1.6                              | 1.6                              | 2.3                               |
| Disallowed                                | 0                                | 0                                | 0                                 |
| Average B factor (Å <sup>2</sup> )        | 26                               | 21                               | 136.8                             |
| Protein                                   | 24.9                             | 19.4                             | 137.3                             |
| water molecules                           | 34.7                             | 32.8                             | 116.8                             |

**Supplementary Table S2. Previously published structures of *Mj*TyrRS variants, mutated positions, and substrates (ligand)**

| Ligand                                                 | Positions of Mutated Residues |     |     |     |     |     |      |      |      |      |      |      |      |      |      |      |      |      |      |      | PDB ID    |
|--------------------------------------------------------|-------------------------------|-----|-----|-----|-----|-----|------|------|------|------|------|------|------|------|------|------|------|------|------|------|-----------|
| Tyr (wild type)                                        | M6                            | Y32 | I63 | L65 | H70 | Q75 | E107 | F108 | Q109 | Y114 | Q155 | D158 | I159 | Y161 | L162 | V164 | A167 | A180 | C190 | D286 | 1J1U [12] |
| <i>o</i> NBTyr                                         |                               | Gly |     | Gly |     |     |      | Glu  |      |      |      | Ser  |      |      | Glu  |      |      |      |      | Arg  | this work |
| 4-(trimethylsilyl)-Phe                                 |                               | His | Gly | Val | Gln |     |      |      |      |      |      | Gly  | Gly  |      |      | Gly  |      |      |      |      | 7CKG [40] |
| 3-nitro-Tyr                                            |                               | His |     |     | Thr |     |      |      |      |      |      | His  | Ala  |      | Arg  |      |      |      |      |      | 6WRK [41] |
| 3-nitro-Tyr                                            |                               | His |     |     | Ala |     |      |      |      |      |      | Ser  | Ala  |      | Arg  |      |      |      |      |      | 6WRN [41] |
| 3-nitro-Tyr                                            |                               | His |     |     | Cys |     |      |      |      |      |      | Cys  | Ala  |      | Arg  |      |      |      |      |      | 6WRQ [41] |
| 3-nitro-Tyr                                            |                               | His |     |     | Ala |     |      |      |      |      |      | Cys  | Ala  |      | Arg  |      |      |      |      |      | 6WRT [41] |
| 4-Borono-Phe                                           | Leu                           | Ser |     | Ala | Met |     |      |      |      |      |      | Ser  |      |      | Glu  |      |      |      |      | Arg  | 5N5U [42] |
| $\beta$ -1-azulenyl-Ala <sup>1</sup>                   |                               | Gly |     | Trp | Gly |     |      | His  | Asn  |      |      | Ala  |      |      | Asn  |      |      |      |      | Arg  | 5NSF [43] |
| 4-carboxymethyl-Phe                                    |                               | Ser |     | Ala |     |     |      | Lys  | His  |      |      | Gly  |      |      | Lys  |      |      |      |      |      | 5U36 [44] |
| <i>m-o</i> NB-DOPA <sup>2</sup>                        |                               | Ala |     | Ile | Ala |     |      |      | Ala  |      |      | Ala  | Ala  |      | Met  |      | Asn  | Gln  |      | Arg  | 5L7P [8]  |
| 3,5-dichloro-Tyr                                       |                               | Leu |     | Ile | Gly |     |      | Ile  | Leu  | Gly  |      | Ser  |      |      | Met  |      |      |      |      |      | 4NX2 [45] |
| Tco-amF <sup>3</sup>                                   |                               | Gly |     | Glu |     |     |      | Trp  | Met  |      |      | Ser  |      |      | Lys  |      |      |      |      |      | 4PBT [46] |
| BibaF <sup>4</sup>                                     |                               | Gly |     | Glu |     |     |      | Trp  | Met  |      |      | Ser  |      |      | Lys  |      |      |      |      |      | 4PBR [46] |
| BibaF <sup>4</sup>                                     |                               | Gly |     | Glu |     |     |      |      |      |      |      | Gly  | Cys  |      |      |      |      |      |      |      | 4PBS [46] |
| <i>m</i> -nitro-Tyr                                    |                               | His |     |     | Gly |     |      |      |      |      |      | Ser  | Ala  |      | Arg  |      |      |      |      |      | 4NDA[47]  |
| 3,5-difluoro-Tyr                                       |                               | Arg |     | Tyr | Gly |     |      | Asn  | Cys  |      |      | Asn  |      |      | Ser  |      |      |      |      |      | 4HJX [48] |
| 4-cyano-Phe                                            |                               | Leu |     | Val |     |     |      | Trp  | Met  |      |      | Gly  | Ala  |      |      |      |      |      |      |      | 3QE4 [49] |
| 4-cyano-Phe                                            |                               | His |     |     | Cys | Asn |      |      |      |      |      | Ser  | Ala  |      | Arg  |      |      |      |      |      | 4ND6 [47] |
| 4-cyano-Phe                                            |                               | His |     |     | Cys |     |      |      |      |      |      | Ser  | Ala  |      | Arg  |      |      |      |      |      | 4ND7 [47] |
| <i>p</i> -(2-tetrazolyl)-Phe                           |                               | Leu |     | Ile |     |     |      |      | Met  |      |      | Gly  |      |      | Val  | Gly  |      |      |      |      | 3N2Y [50] |
| 3-iodo-L-Tyr                                           |                               |     |     |     | Ala |     |      |      |      |      |      | Thr  | Ser  |      |      |      |      |      |      | Tyr  | 2ZP1      |
| 4-(2,2,2-trifluoroethyl)-Phe                           |                               | Ile |     |     | Phe |     | Ser  |      | Met  |      |      | Pro  | Leu  |      | Glu  |      |      |      |      |      | 3D6V [51] |
| <i>p</i> -trifluoromethyldiaziridinyl-Phe <sup>5</sup> |                               | Ile |     |     | Phe |     | Ser  |      | Met  |      |      | Pro  | Leu  |      | Glu  |      |      |      |      |      | 3D6U [51] |
| 3-(2,2'-bipyridin-5-yl)-Ala                            |                               | Gly |     | Tyr | Ala |     |      |      |      |      | Glu  | Gly  | Trp  |      | Ser  |      |      |      |      |      | 2PXH [52] |
| <i>p</i> -(benzoyl)-Phe                                |                               | Gly |     |     |     |     | Pro  |      |      |      |      | Thr  | Ser  | Arg  |      |      |      |      | Met  |      | 2HGZ [53] |
| 4-bromo-Phe                                            |                               | Leu |     |     |     |     | Ser  |      |      |      |      | Pro  | Leu  |      | Glu  |      |      |      |      |      | 2AG6 [54] |
| $\beta$ -(2-naphthyl)-Ala                              |                               | Leu |     |     |     |     | Ser  |      |      |      |      | Pro  | Ala  |      | Gln  |      | Val  |      |      |      | 1ZH0 [54] |
| 4-acetyl-Phe                                           |                               | Leu |     |     |     |     |      |      |      |      |      | Gly  | Cys  |      | Arg  |      |      |      |      |      | 1ZH6 [55] |

<sup>1</sup>  $\beta$ -(1-azulenyl)-l-Ala: (2~S)-2-azanyl-3-(2,6-dihydroazulen-1-yl)-propanoic acid

<sup>2</sup> *m-o*NB-DOPA: (2~S)-2-azanyl-3-{3-[(2-nitrophenyl)methoxy]-4-oxidanyl-phenyl}-propanoic acid

<sup>3</sup> Tco-amF: *p*-trans-cyclooctene-amido-Phe: 4-{[(1R,4E)-cyclooct-4-en-1-ylcarbonyl]amino}-phenylalanine

<sup>4</sup> BibaF: *p*-2-bromoisobutyramido-Phe: 4-[(2-bromo-2-methylpropanoyl)amino]-phenylalanine

<sup>5</sup> *p*-trifluoromethyldiaziriny-Phe: 4-[3-(trifluoromethyl)-diaziridin-3-yl]-phenylalanine

Table S3. DNA sequences of codon-optimized synthetic genes and primers

|                                                                                                                                                                                                                                                                                                                                                                                                                                                                                                                                                                                                                                                                                                                                                                                                                                                                                                                                                                                                                       |
|-----------------------------------------------------------------------------------------------------------------------------------------------------------------------------------------------------------------------------------------------------------------------------------------------------------------------------------------------------------------------------------------------------------------------------------------------------------------------------------------------------------------------------------------------------------------------------------------------------------------------------------------------------------------------------------------------------------------------------------------------------------------------------------------------------------------------------------------------------------------------------------------------------------------------------------------------------------------------------------------------------------------------|
| Name and description/ Sequence                                                                                                                                                                                                                                                                                                                                                                                                                                                                                                                                                                                                                                                                                                                                                                                                                                                                                                                                                                                        |
| A synthetic gene for oNB <sup>o</sup> TyrRS with a TEV protease site and His <sub>6</sub> -tag at the C-terminus                                                                                                                                                                                                                                                                                                                                                                                                                                                                                                                                                                                                                                                                                                                                                                                                                                                                                                      |
| ATGGACGAATTTGAAATGATAAAGAGAAACACATCTGAAATTATCAGCGAGGAAGAGTTAAGAGAGGTTTTAAAAAAGATGAAAAATCTGCTGGTATAGGTTTTGAACCAAGTGGTAAATACATTTAGGGCATTATCTCCAATAAAAAAGATGATTGATTTACAAAATGCTGGATTGATATAATTA TAGGTTTGGCTGATTTACACGCCTATTTAAACCAGAAAGGAGAGTTGGATGAGATTAGAAAAATAGGAGATTATAACAAAAAAGTTTTTGAAGC AATGGGGTTAAAGGCCAAAATATGTTTATGGAAGTGAAGAACAGCTTGATAAGGATTATACACTGAATGTCTATAGATTGGCTTTAAAAACTACCTT AAAAAAGAGCAAGAAGGAGTATGGAACCTATAGCAAGAGAGGATGAAAATCCAAAGTTGCTGAAGTTATCTATCCAATAATGCAGGTAAATTCT ATTCAATTATGAAGGCGTTGATGTTGCAGTTGGAGGGATGGAGCAGAGAAAAATACACATGTTAGCAAGGGAGCTTTTACCAAAAAAGGTTGTT TGTATTCACAACCCGTGCTTAACGGGTTTGGATGGAGAAGGAAAGATGAGTTCCTTCAAAGGGAATTTTATAGCTGTTGATGACTCTCCAGAAG AGATTAGGGCTAAGATAAAGAAAGCATACTGCCAGCTGGAGTTGTTGAAGGAAATCCAATAATGGAGATAGCTAAATACTTCCTTGAATATCCT TTAACCATAAAAAGGCCAGAAAAATTTGGTGGAGATTTGACAGTTAATAGCTATGAGGAGTTAGAGAGTTTATTTAAAAATAAGGAATTGCATCC AATGCGTTTAAAAAATGCTGTAGCTGAAGAACCTATAAAGATTTTAGAGCCAATTAGAAAAGAGATTATCGGATCCGGAACCTGTATTTTCAGG GACTCGAGCACCAACCACCACCACCACTGA |
| Primers for cloning to pET-21a with <i>Nde</i> I and <i>Xho</i> I sites (in <i>bold italic</i> )                                                                                                                                                                                                                                                                                                                                                                                                                                                                                                                                                                                                                                                                                                                                                                                                                                                                                                                      |
| Forward: TTTAAGAAGGAGATATACATATGGACGAATTTGAAATGATAAAGAGAAACACATCTG                                                                                                                                                                                                                                                                                                                                                                                                                                                                                                                                                                                                                                                                                                                                                                                                                                                                                                                                                    |
| Reverse: GTGGTGGTGGTGGTGGTGC <b><i>T</i></b> CGAGTCCCTG                                                                                                                                                                                                                                                                                                                                                                                                                                                                                                                                                                                                                                                                                                                                                                                                                                                                                                                                                               |
| A synthetic gene for HEWL (19-147) with His-tag and SUMO-tag at the N-terminus                                                                                                                                                                                                                                                                                                                                                                                                                                                                                                                                                                                                                                                                                                                                                                                                                                                                                                                                        |
| ATGAAAGATCATCTCATCCACAATCATCACAAACATGAGCACGCTCATGCCGAACACCTGGGGTCCGACTCAGAAGTCAATCAAGAAGCTAAGC CAGAGGTCAAGCCAGAAGTCAAGCCTGAGACTCACATCAATTTAAAGGTGTCCGATGGATCTTCAGAGATCTTCTTCAAGATCAAAAAGACCAC TCCTTTAAGAAGGCTGATGGAAGCGTTCGCTAAAGACAGGGTAAGGAAATGGACTCCTTAAGATTCTTGACGACGGTATTAGAATTCAGCT GATCAGACCCCTGAAGATTTGGACATGGAGGATAACGATATTATTGAGGCTCACAGAGAACAGATTGGTGGAAAAGTTTTTGGTCGTTGTGAAC TGGCAGCAGCAATGAAACGTCATGGTCTGGATAACTATCGTGGTTATAGCTTAGGTAATTGGGTTTGC GTTGGCAAATTTGAGAGCAATTTCAAT ACCCAGGCAACCAATCGTAATACCGATGGTAGCACCGATTATGGTATTCTGCAGATTAATAGCCGTTGGTGGTGTAAATGATGGTCGTACACCGGG TAGCCGTAATCTGTGTAATATCCGTGTAGCGCACTGCTGAGCAGCGATATTACCGCAAGCGTTAATTGTGCCAAAAAATCGTGAGTGATGGTA ATGGTATGAATGCATGGGTTGCATGGCGTAATCGTTGTAAAGGCACCGATGTTTCAGGCATGGATTCGTGGTTGTCGTCTGTAATGA                                                                                                                                                                                                                                      |
| Primers for the introduction of TAG codon (in <i>bold italic</i> ) at Tyr20 of HWEL                                                                                                                                                                                                                                                                                                                                                                                                                                                                                                                                                                                                                                                                                                                                                                                                                                                                                                                                   |
| Forward: CTGGATAAC <b><i>TAG</i></b> CGTG <b><i>GT</i></b> TATAGCTTAGGTAATTGGGTT                                                                                                                                                                                                                                                                                                                                                                                                                                                                                                                                                                                                                                                                                                                                                                                                                                                                                                                                      |
| Reverse: TATAACCACGCTAGTTATCCAGACCATGACGTTTCATTG                                                                                                                                                                                                                                                                                                                                                                                                                                                                                                                                                                                                                                                                                                                                                                                                                                                                                                                                                                      |
